# Supplementary material for: Dealloying/exsolution-induced nanoporous perovskite oxides anchored with alloy nanoparticles for the oxygen evolution reaction
Source: Royal Society of Chemistry journal article supplement (doi:10.1039/d2ce01462a), 2022-12-12
Supplement: d2ce01462a1.pdf [file d2ce01462a1.pdf]

# Dealloying/exsolution-induced nanoporous perovskite oxides anchored with alloy nanoparticles for oxygen evolution reaction

Yu Cui<sup>a</sup>, Yang Chao<sup>a</sup>, Jianbin Lin<sup>a</sup>, Wenxue Ke<sup>a</sup>, Xin He<sup>a</sup>, Mei Chen<sup>a</sup>, Chi Zhang<sup>a,\*</sup>

<sup>a</sup> School of Applied Physics and Materials, Wuyi University, 99 Yingbin Road, Jiangmen 529020, China

Corresponding author: Chi Zhang: [chizhang@wyu.edu.cn](mailto:chizhang@wyu.edu.cn), [ch.zhang@outlook.com](mailto:ch.zhang@outlook.com)

## 1. Supplementary figures:

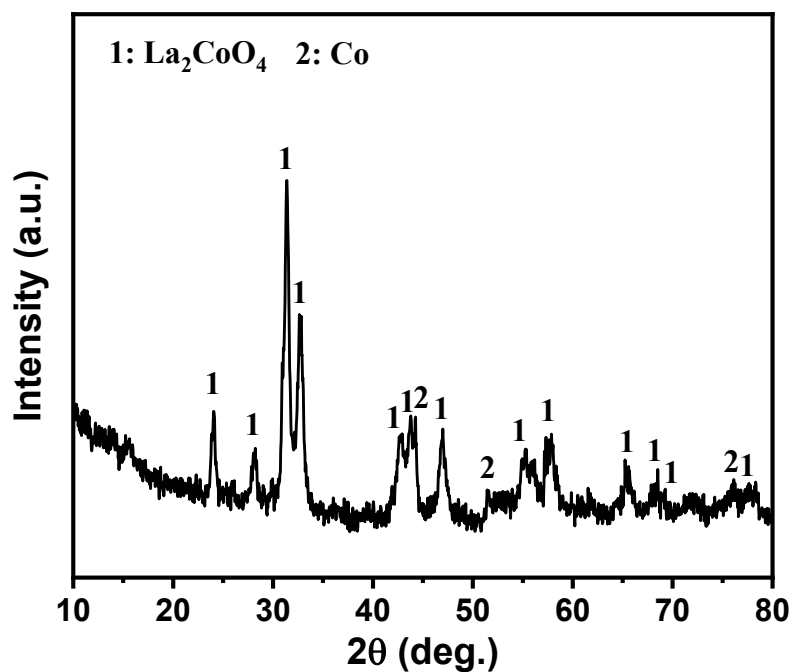

Figure S1. XRD patterns of reduced LaCoO<sub>3</sub> in 5% H<sub>2</sub>/Ar at 700 °C for 1 h.

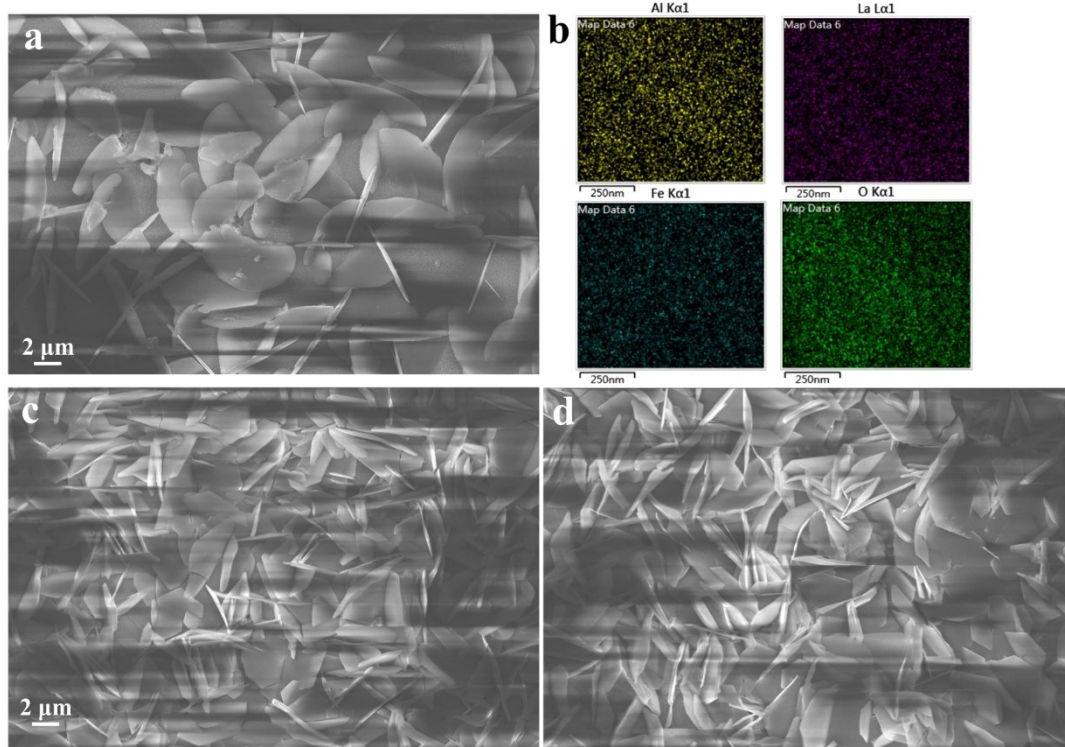

**Figure S2:** Dealloyed samples of (a)  $d\text{-Al}_{88.4}\text{La}_{5.4}\text{Fe}_6$ , (b)  $d\text{-Al}_{88.4}\text{La}_{5.4}\text{Co}_{0.6}\text{Fe}_{5.4}$ , and (c)  $d\text{-Al}_{88.4}\text{La}_{5.4}\text{Co}_{1.2}\text{Fe}_{4.8}$ .

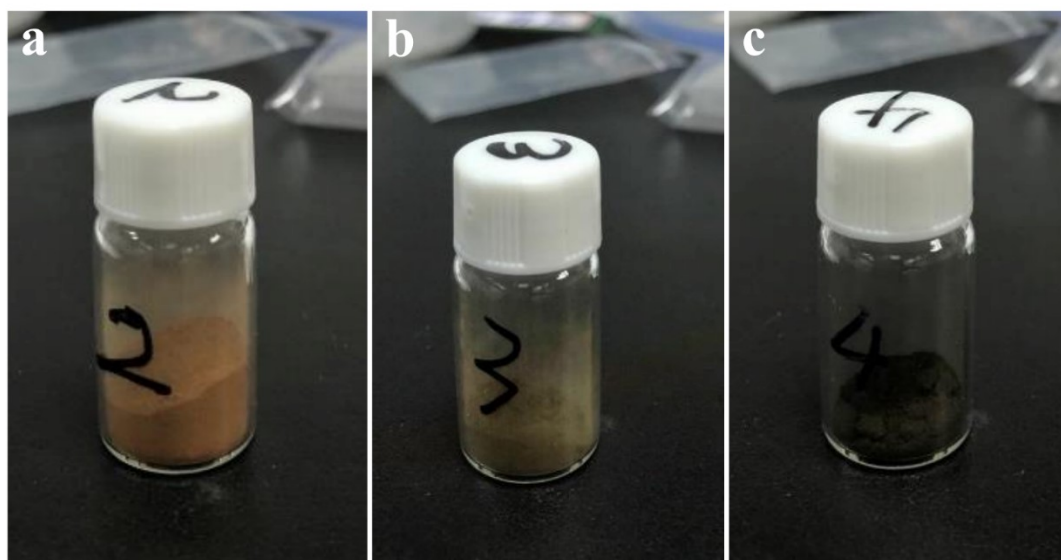

**Figure S3.** Photo of annealed samples: (a) LF, (b) LCF19, and (c) LCF28.

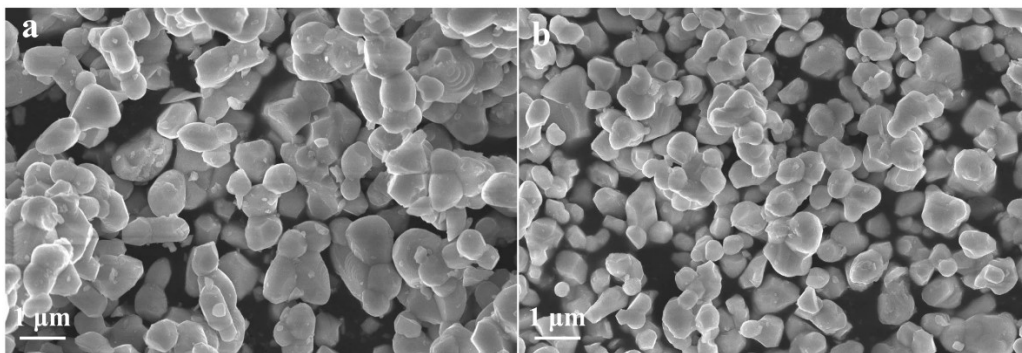

**Figure S4.** LCF19 synthesized through (a) sol-gel and (b) solid-state reaction method.

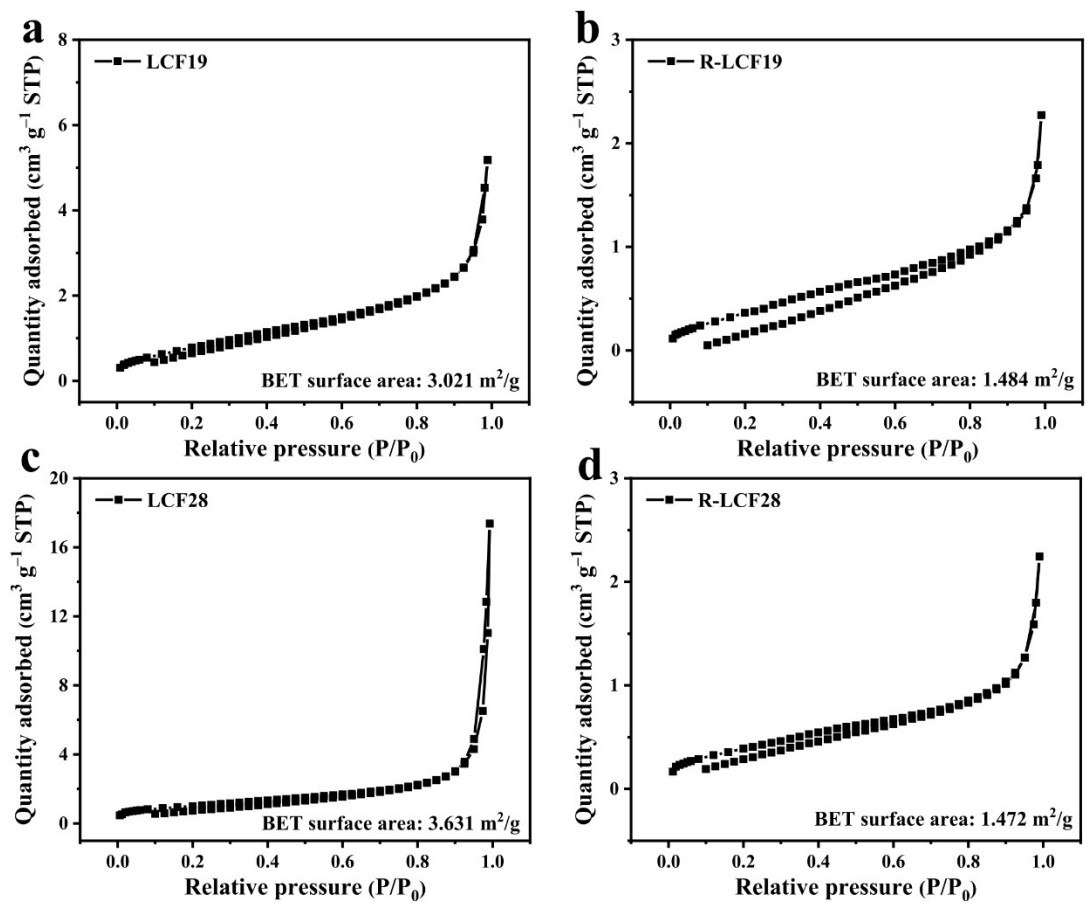

**Figure S5.** Nitrogen adsorption/desorption isotherms of (a) LCF19, (b) R-LCF19, (c) LCF28, and (d) R-LCF28.

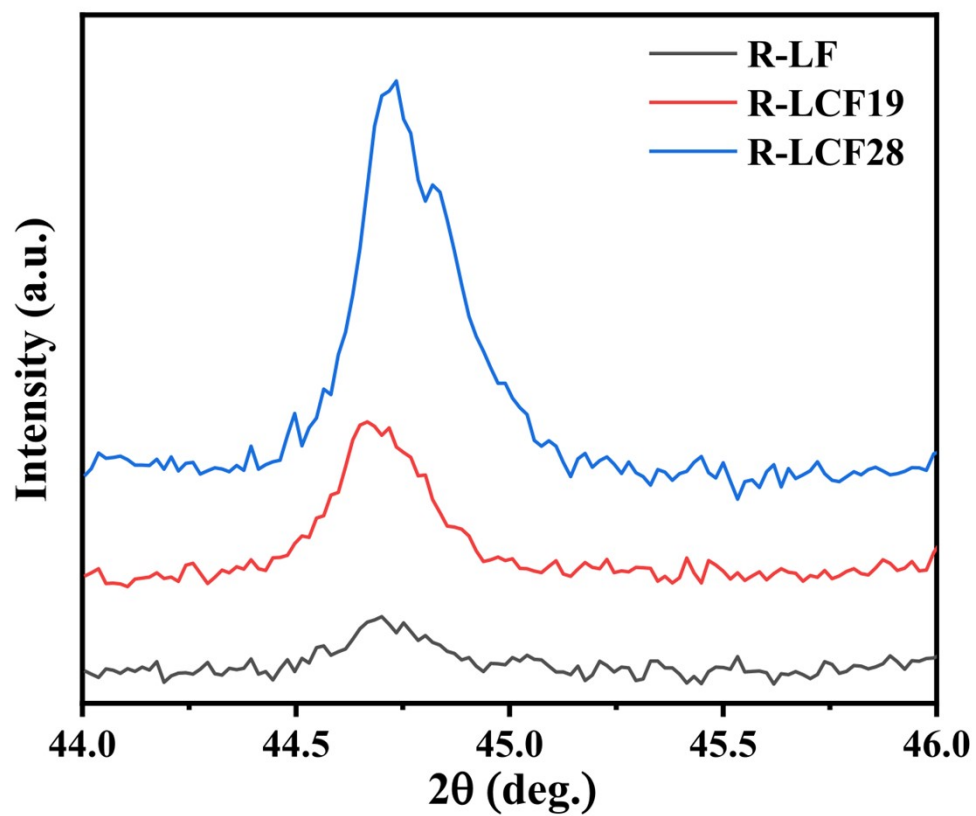

**Figure S6.** XRD pattern of R-LF, R-LCF19, and R-LCF28 between 44 to 46 degree ( $2\theta$ ).

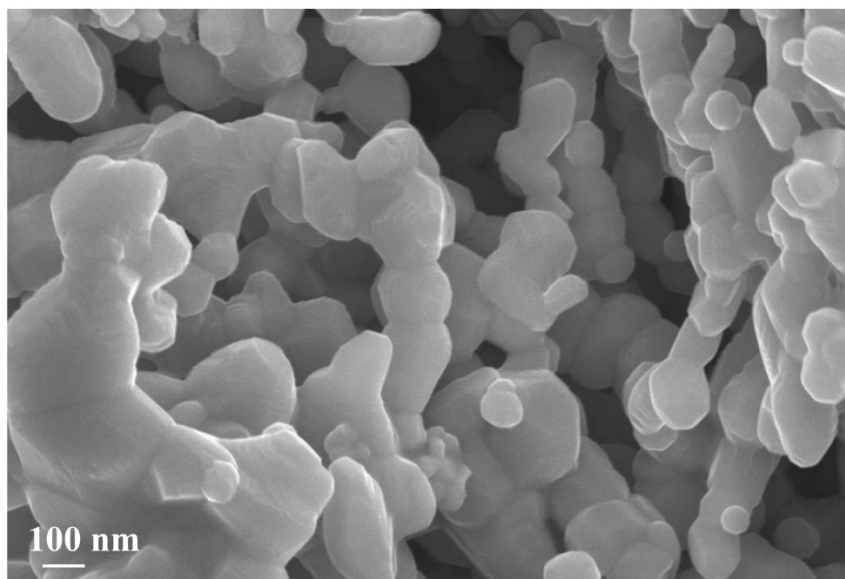

**Figure S7.** SEM image of LCF19 of high magnification.

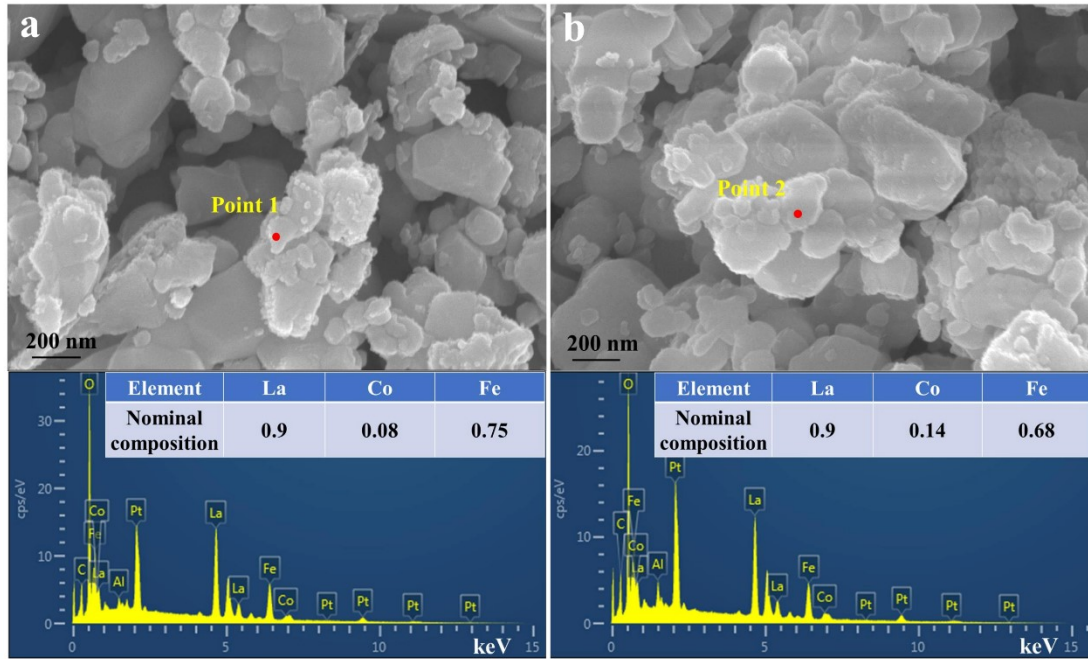

Figure S8. The SEM and EDS spectra of (a) R-LCF19 and (b) R-LCF28.



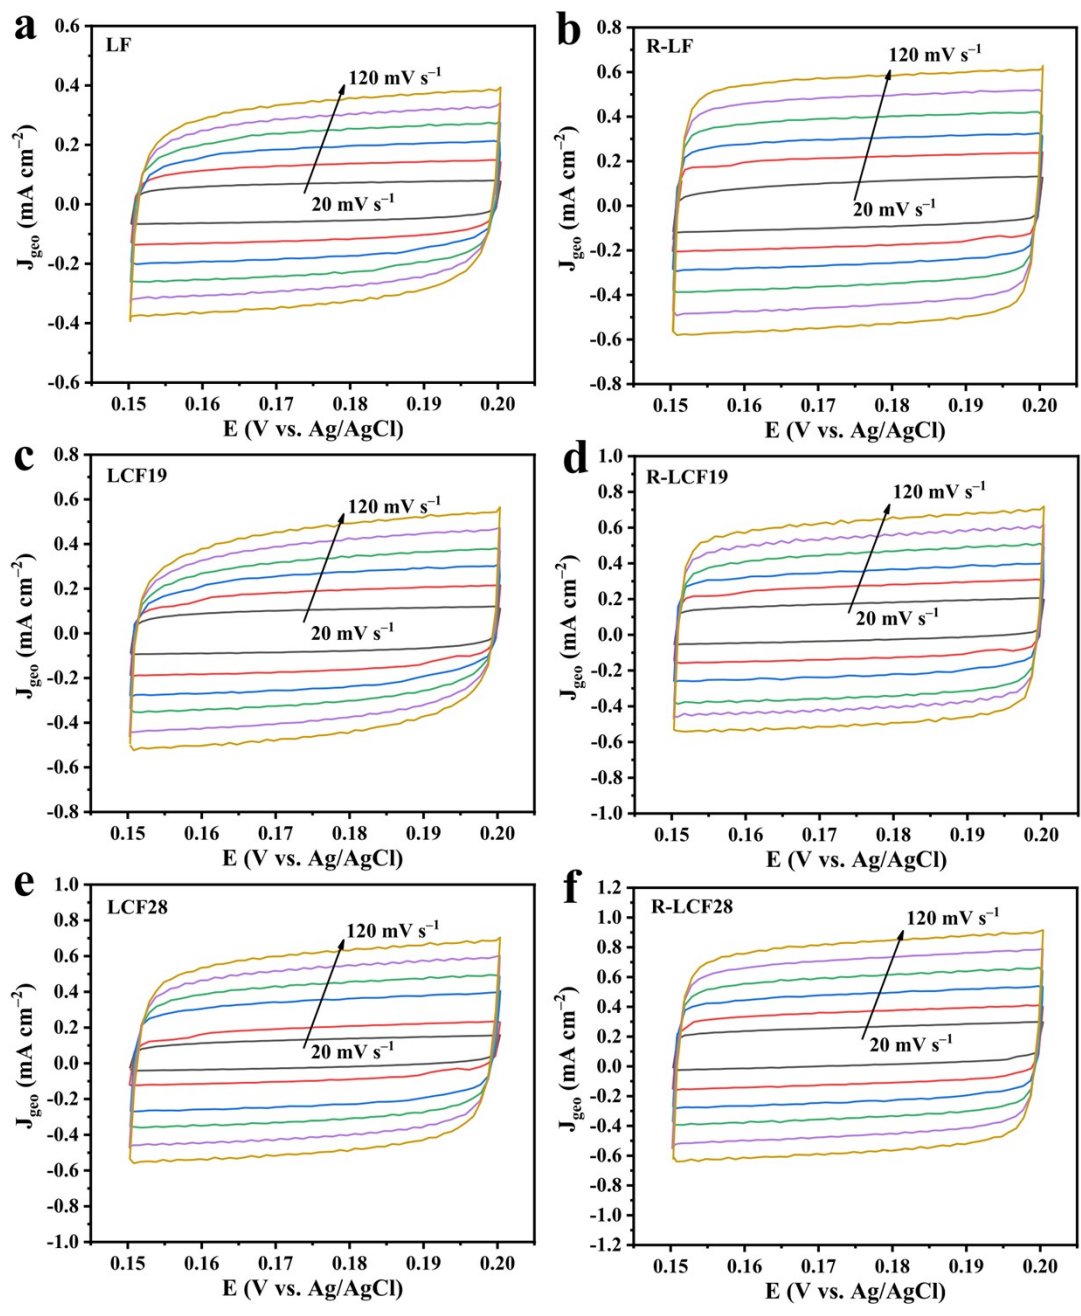

**Figure S9.** CV curves scanning at different scan rates between 20-120  $\text{mV s}^{-1}$  for LF, R-LF, LCF19, R-LCF19, LCF28, and R-LCF8.

## 2. Supplementary tables:

**Table S1** Concentration of La, Co, and Fe calculated by ICP-OES.

| Sample  | Element content (wt. %) |      |       | Element content (at. %) |       |       |
|---------|-------------------------|------|-------|-------------------------|-------|-------|
|         | La                      | Co   | Fe    | La                      | Co    | Fe    |
| R-LF    | 67.47                   | /    | 32.53 | 45.47                   | /     | 54.53 |
| R-LCF19 | 68.35                   | 3.50 | 28.15 | 46.62                   | 5.63  | 47.75 |
| R-LCF28 | 66.95                   | 6.98 | 26.07 | 45.15                   | 11.10 | 43.75 |

**Table S2.** The fitted equivalent circuit values of the catalysts.

| Catalysts | $R_s$ ( $\Omega$ ) | $R_{ct}$ ( $\Omega$ ) |
|-----------|--------------------|-----------------------|
| LF        | 5.36               | 73.05                 |
| R-LF      | 5.44               | 45.32                 |
| LCF19     | 4.93               | 58.31                 |
| R-LCF19   | 5.43               | 30.85                 |
| LCF28     | 5.16               | 57.39                 |
| R-LCF28   | 4.79               | 11.62                 |
